# Supplementary material for: Synthesis of Water Resistance and Moisture-Permeable Nanofiber Using Sodium Alginate–Functionalized Waterborne Polyurethane
Source: MDPI journal article supplement (doi:10.3390/polym12122882), 2020-12-01
Supplement: s1 [file s1]

## **Supporting Information**

### **Synthesis of water resistance and moisture-permeable nanofiber using sodium alginate–functionalized waterborne polyurethane**

Wen-Chi Lu,<sup>a,b</sup> Fu-Sheng Chuang,<sup>c</sup> Manikandan Venkatesan,<sup>a</sup> Chia-Jung Cho,<sup>a,\*</sup> Po-Yun  
Chen,<sup>a</sup> Yung-Ru Tzeng,<sup>a</sup> Yang-Yen Yu,<sup>d</sup> Syang-Peng Rwei,<sup>a</sup> and Chi-Ching Kuo,<sup>a,\*</sup>

<sup>a</sup> Institute of Organic and Polymeric Materials, Research and Development Center of Smart  
Textile Technology, National Taipei University of Technology, Taipei 10608, Taiwan

<sup>b</sup> Department of Applied Cosmetology, Lee-Ming Institute of Technology, New Taipei City  
243083, Taiwan

<sup>c</sup> Department of Fashion and Design, Lee-Ming Institute of Technology, New Taipei City  
243083, Taiwan

<sup>d</sup> Department of Materials Engineering, Ming Chi University of Technology, New Taipei City,  
24301, Taiwan

\*Author to whom all correspondence should be addressed

Tel: 886-2-27712171\*2407    Fax: 886-2-27317174

Correspondence to: \*Prof. C.-C. Kuo: [kuocc@mail.ntut.edu.tw](mailto:kuocc@mail.ntut.edu.tw)

\*Dr. C.-J. Cho: [ppaul28865@mail.ntut.edu.tw](mailto:ppaul28865@mail.ntut.edu.tw)

**Table S1. The composition of WPU/SA blends**

| <b>Code<sup>(1)</sup></b>  | <b>WPU(wt%)</b> | <b>SA(wt%)</b> |
|----------------------------|-----------------|----------------|
| <b>WPU/SA<sub>10</sub></b> | <b>90</b>       | <b>10</b>      |
| <b>WPU/SA<sub>20</sub></b> | <b>80</b>       | <b>20</b>      |
| <b>WPU/SA<sub>30</sub></b> | <b>70</b>       | <b>30</b>      |
| <b>WPU/SA<sub>40</sub></b> | <b>60</b>       | <b>40</b>      |
| <b>WPU/SA<sub>50</sub></b> | <b>50</b>       | <b>50</b>      |

<sup>(1)</sup> Sample name : WPU and SA blended samples were named WPU/SA<sub>xx</sub>, and the subscripts xx was the weight percentages of SA. Similarly, the samples of WPU/SA<sub>xx</sub> blends which crosslinking with calcium chloride were named WPU/CA<sub>yy</sub>.

**Table S2. Water absorption of WPU/CA blends**

| <b>Code</b>                | <b>water absorption <sup>1,2</sup>(wt%)</b> |
|----------------------------|---------------------------------------------|
| <b>WPU</b>                 | <b>10.2</b>                                 |
| <b>CA</b>                  | <b>139.1</b>                                |
| <b>WPU/CA<sub>10</sub></b> | <b>25.7</b>                                 |
| <b>WPU/CA<sub>20</sub></b> | <b>26.9</b>                                 |
| <b>WPU/CA<sub>30</sub></b> | <b>37.5</b>                                 |
| <b>WPU/CA<sub>40</sub></b> | <b>57.3</b>                                 |
| <b>WPU/CA<sub>50</sub></b> | <b>82.5</b>                                 |

1. Water absorption (wt%) = wet weight - dry weight/dry weight×100

2. All dry films of blends were placed in deionized water of 23 ± 1 °C for 2 hours

**Table S3. Moisture permeability of WPU/CA**

| Code                 | Moisture permeability (g/m <sup>2</sup> -24hr) |
|----------------------|------------------------------------------------|
| WPU                  | 6.2                                            |
| CA                   | 69.1                                           |
| WPU/CA <sub>10</sub> | 19.0                                           |
| WPU/CA <sub>20</sub> | 20.0                                           |
| WPU/CA <sub>30</sub> | 25.1                                           |
| WPU/CA <sub>40</sub> | 31.4                                           |
| WPU/CA <sub>50</sub> | 34.7                                           |

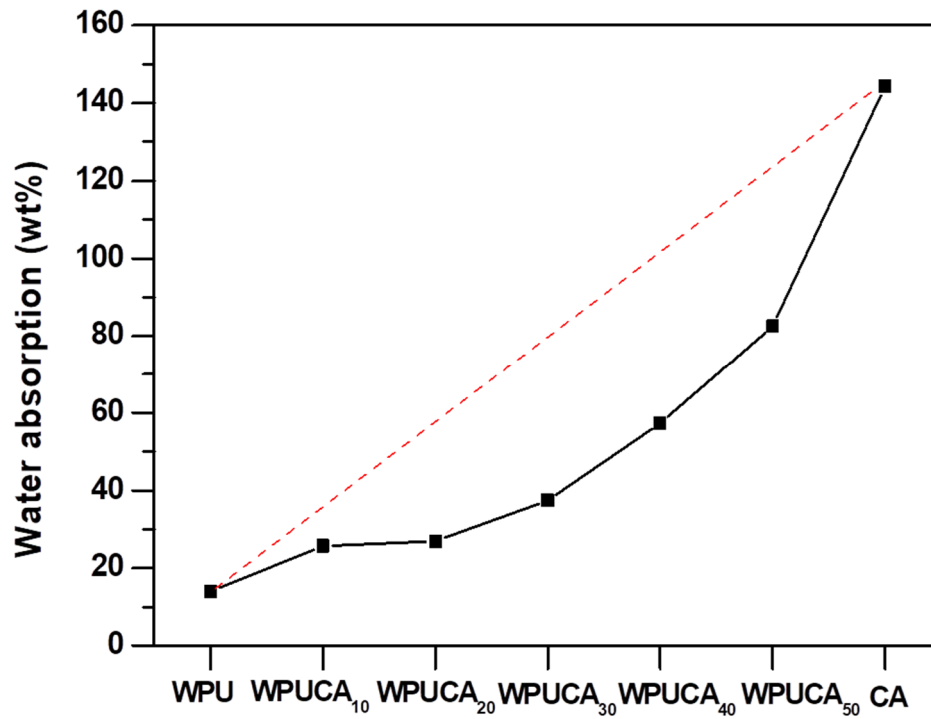

**Figure S1. Water absorption during 2hrs of WPU/CA blends**

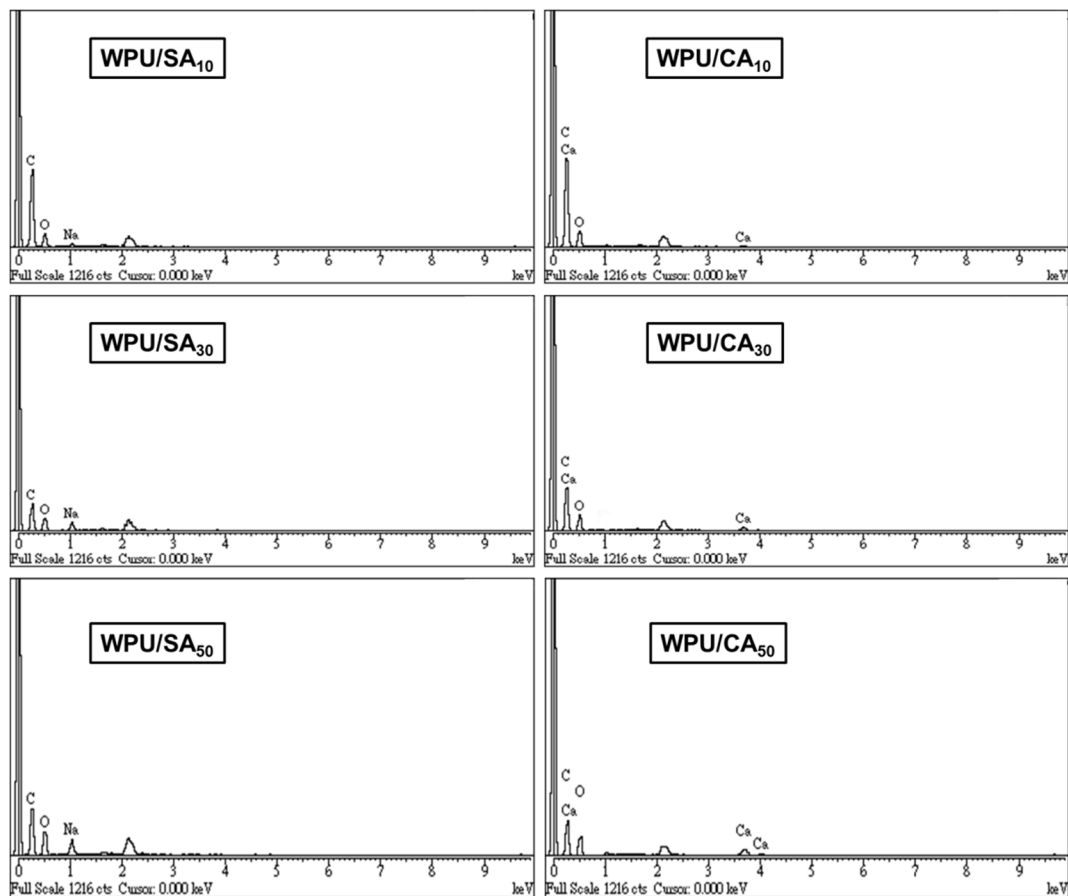

**Figure S2.** EDS of cross section of WPU/CA blends

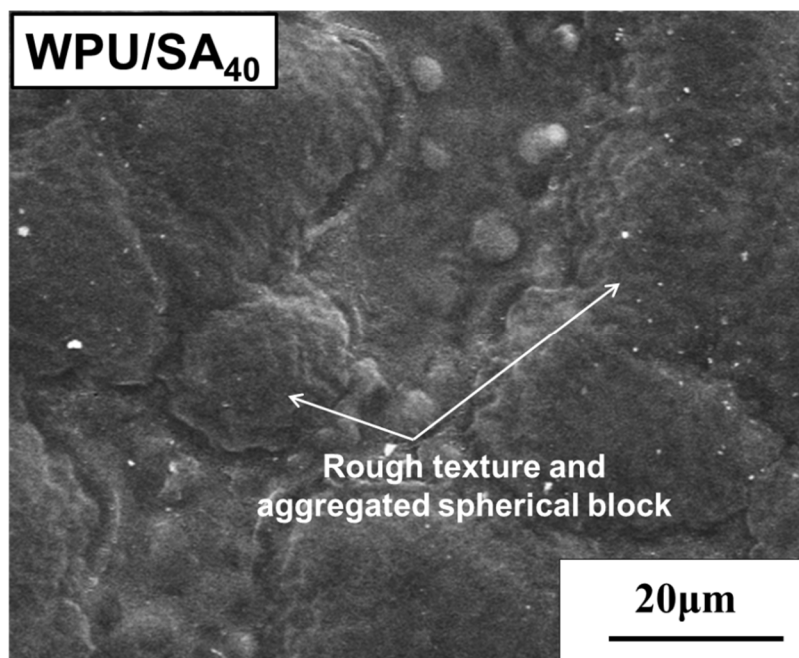

**Figure S3.** Rough texture and aggregated spherical block of WPU/CA<sub>40</sub> SEM Surface morphology

**Video S1.** A lab experiment was carried out to confirm the moisture permeability of

nanofiber web.
